# Supplementary material for: Lung microbiota promotes tolerance to allergens in neonates via PD-L1
Source: Springer Nature journal article supplement (doi:10.1038/nm.3568), 2014-05-11
Supplement: 41591_2014_BFnm3568_MOESM58_ESM.pdf [file 41591_2014_BFnm3568_MOESM58_ESM.pdf]

## **Lung microbiota promotes tolerance to allergens in neonates via PD-L1**

Eva S. Gollwitzer<sup>1</sup>, Sejal Saglani<sup>2</sup>, Aurélien Trompette<sup>1</sup>, Koshika Yadava<sup>1</sup>, Rebekah Sherburn<sup>2</sup>, Kathy D. McCoy<sup>3</sup>, Laurent P. Nicod<sup>1</sup>, Clare M. Lloyd<sup>2</sup> and Benjamin J. Marsland<sup>1</sup>

<sup>1</sup> Faculty of Biology and Medicine, University of Lausanne, Service de Pneumologie, BH19.206, CHUV, Rue du Bugnon 46, 1011 Lausanne, Switzerland. <sup>2</sup> Leukocyte Biology, National Heart and Lung Institute, Faculty of Medicine, Imperial College, London, United Kingdom. <sup>3</sup> Maurice Müller Laboratories (DKF), Universitätsklinik für Viszerale Chirurgie und Medizin Inselspital, Murtenstrasse 35, University of Bern, 3010 Bern, Switzerland.

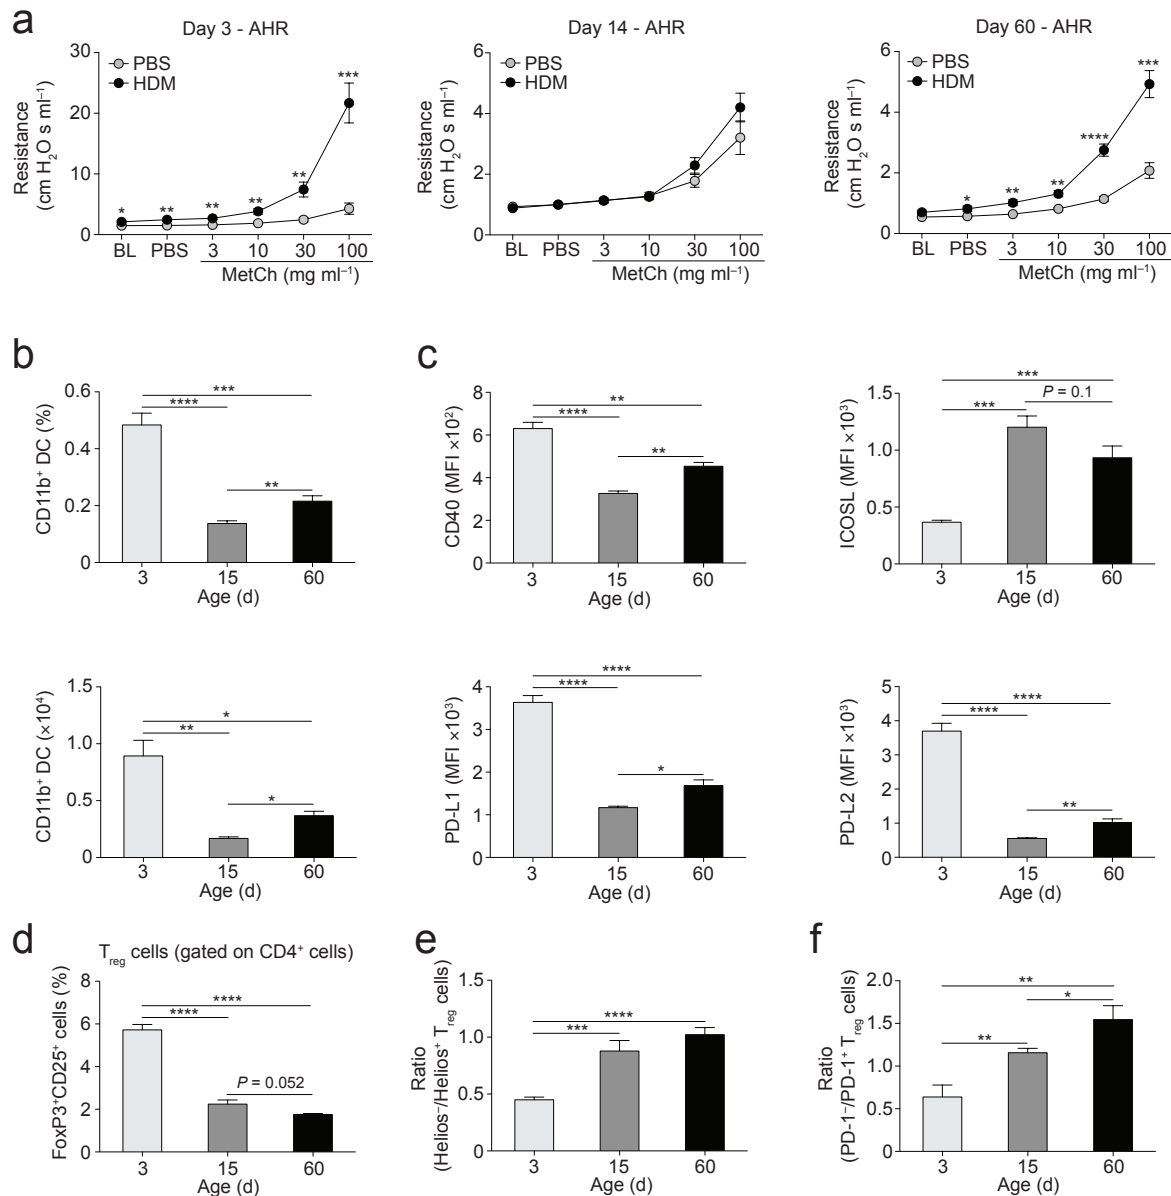

### Supplementary Figure 1: Immunological parameters after neonatal and adult HDM exposure.

(a) Airway hyperresponsiveness (AHR) after HDM exposure of day three, day 14 and day 60 old mice as measured by airway resistance. (b) Frequencies and total number and (c) surface expression of CD40, ICOSL, PD-L1 and PD-L2 on CD11b<sup>+</sup> DCs. (d) Frequencies of T<sub>reg</sub> cells in the CD4<sup>+</sup> T cell compartment, (e) their intracellular expression profile of Helios and (f) their surface expression pattern of PD-1. Results are representative of two independent experiments. Data are expressed as mean ± s.e.m. ( $n = 8$  PBS-treated mice per timepoint and  $n = 11$  day 3,  $n = 10$  day 14 and  $n = 12$  day 60 HDM-treated mice in **a**;  $n = 5$  neonatal mice,  $n = 4$  pre-weaning and adult mice in **b-f**). Statistical significance was determined with Student's *t* test. \* $P \leq 0.05$ , \*\* $P \leq 0.01$ , \*\*\* $P \leq 0.001$ , \*\*\*\* $P \leq 0.0001$ .

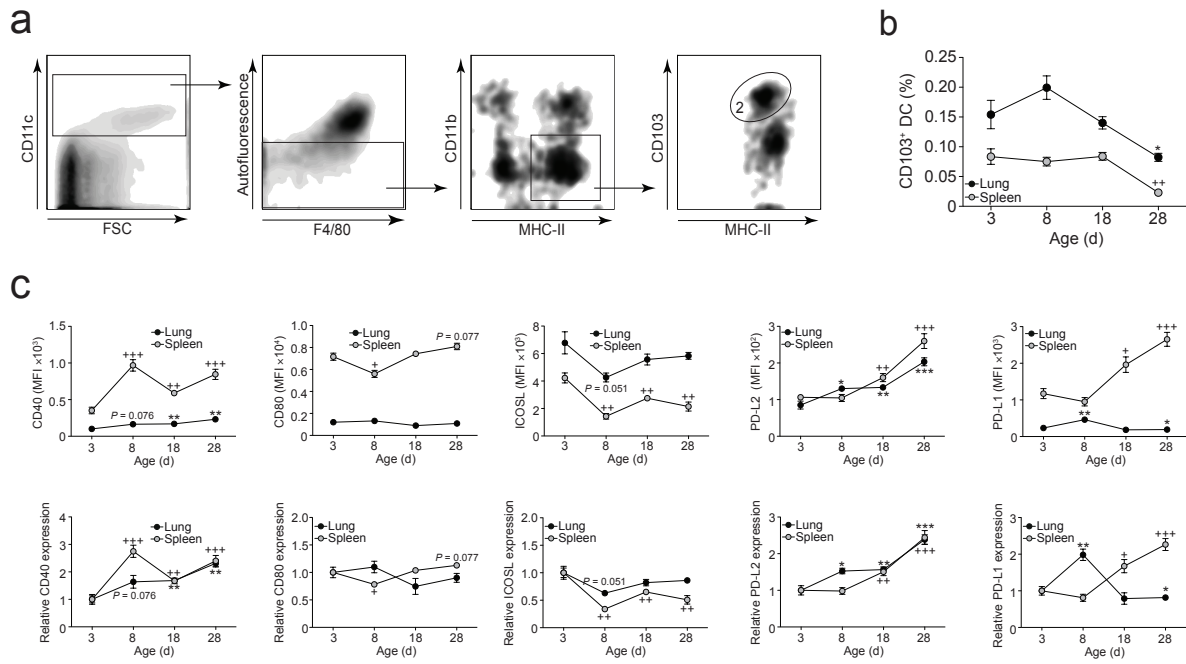

**Supplementary Figure 2: PD-L1 is transiently expressed on CD103<sup>+</sup> DCs in the lung.**

(a) Gating strategy to identify the CD103<sup>+</sup> lung DC population (2). (b) Frequency of CD103<sup>+</sup> in the lung and spleen of naïve BALB/c mice. (c) Surface expression of CD40, CD80, ICOSL, PD-L1, and PD-L2 on CD103<sup>+</sup> DC represented as total mean fluorescent intensity (MFI) and relative MFI to day three expression levels. Results are representative of two independent experiments. Data are expressed as mean ± s.e.m. ( $n = 4$  day 3,  $n = 3$  day 8,  $n = 5$  day 18, and  $n = 4$  day 28 old mice). Statistical significance was determined with Student's *t* test and is expressed in relation to day three (\* for lung and + for spleen). \* $P \leq 0.05$ , \*\* $P \leq 0.01$ , \*\*\* $P \leq 0.001$ .

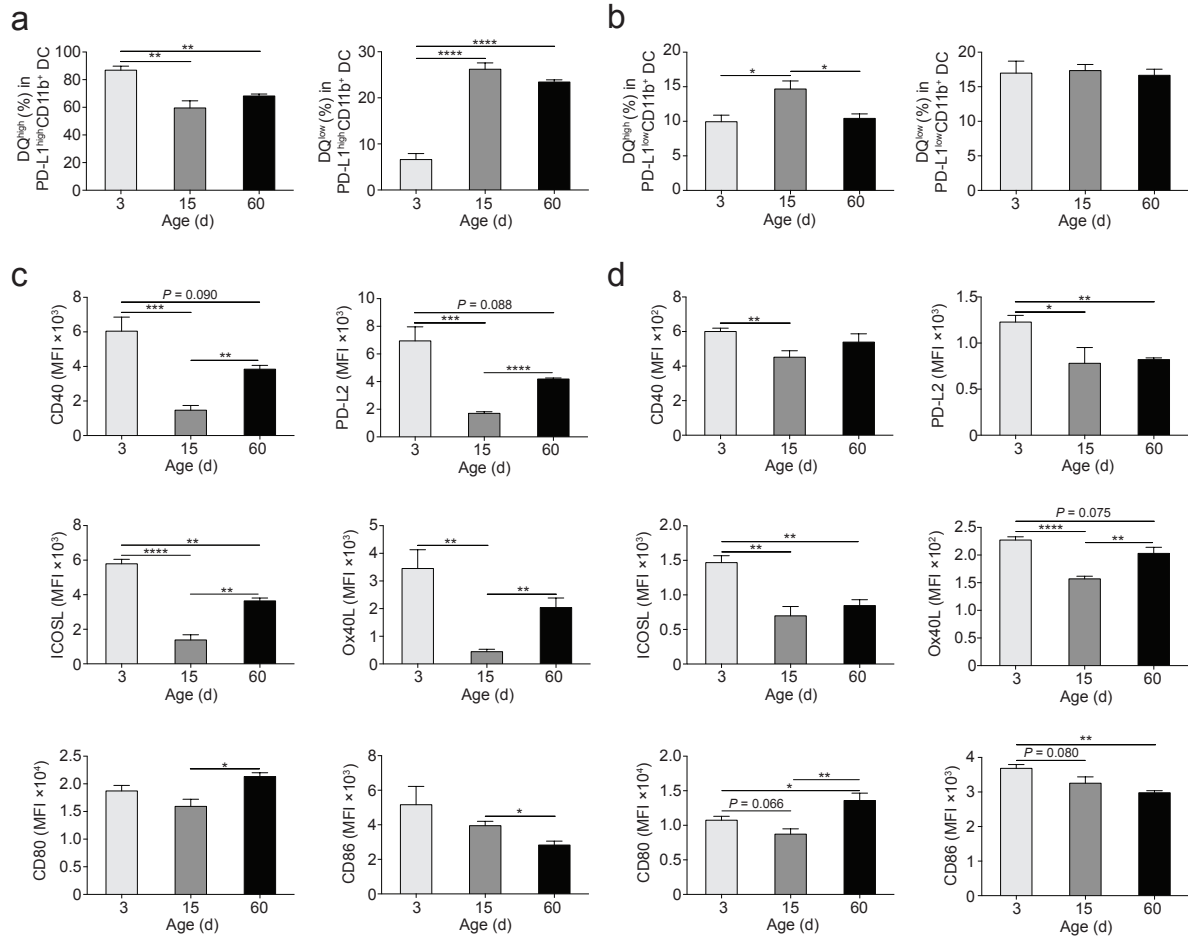

**Supplementary Figure 3: PD-L1<sup>high</sup> DCs have a higher antigen processing ability and are more activated at baseline.**

(a,b) Measurement of antigen processing ability of (a) PD-L1<sup>high</sup> and (b) PD-L1<sup>low</sup> CD11b<sup>+</sup> DCs in the lungs of naïve mice. (c,d) Surface expression of CD40, PD-L2, ICOSL, Ox40L, CD80 and CD86 on (c) PD-L1<sup>high</sup> and (d) PD-L1<sup>low</sup> CD11b<sup>+</sup> DC represented as total mean fluorescent intensity (MFI). Results are representative of two independent experiments. Data are expressed as mean ± s.e.m. (*n* = 5 neonatal and pre-weaning mice and *n* = 3 adult mice). Statistical significance was determined with Student's *t* test. \**P* ≤ 0.05, \*\**P* ≤ 0.01, \*\*\**P* ≤ 0.001, \*\*\*\**P* ≤ 0.0001.

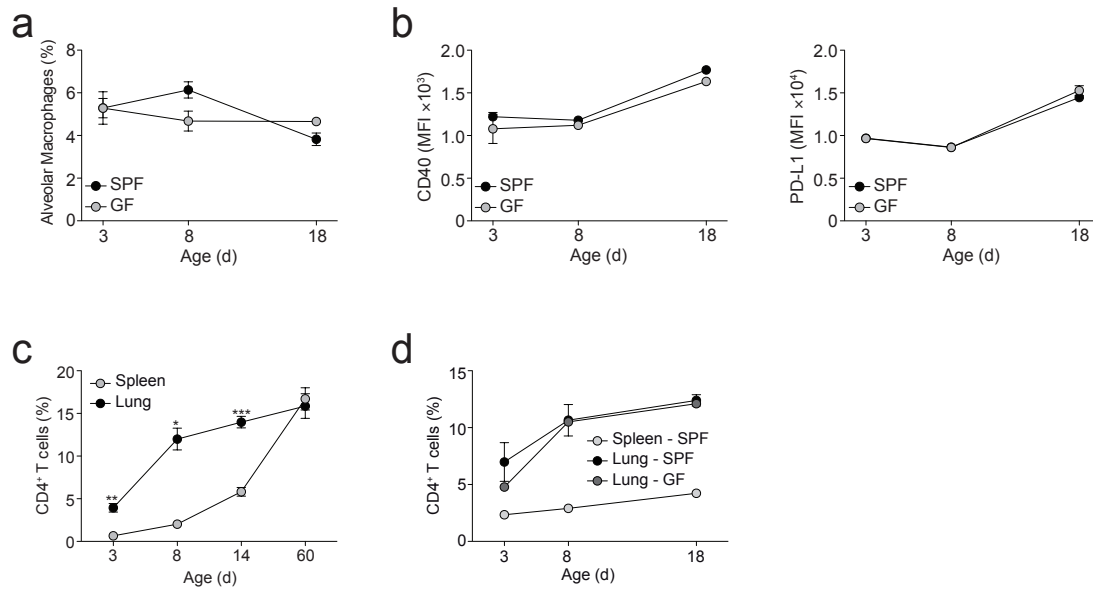

**Supplementary Figure 4: Frequencies and phenotype of alveolar macrophages and CD4<sup>+</sup> T cells are not affected by the microbiota.**

(a) Frequencies of alveolar macrophages and (b) their surface expression of CD40 and PD-L1 in germ-free and SPF mice. (c) Frequencies of CD4<sup>+</sup> T cells in the lung and spleen of SPF mice. (d) Frequencies of CD4<sup>+</sup> T cells in the lung and spleen of SPF mice as compared to the lung of germ-free mice. Results are representative of data generated in two independent experiments. Data are expressed as mean  $\pm$  s.e.m. ( $n = 3$  day 3,  $n = 5$  day 8 and  $n = 4$  GF and 5 SPF day 18 old mice).

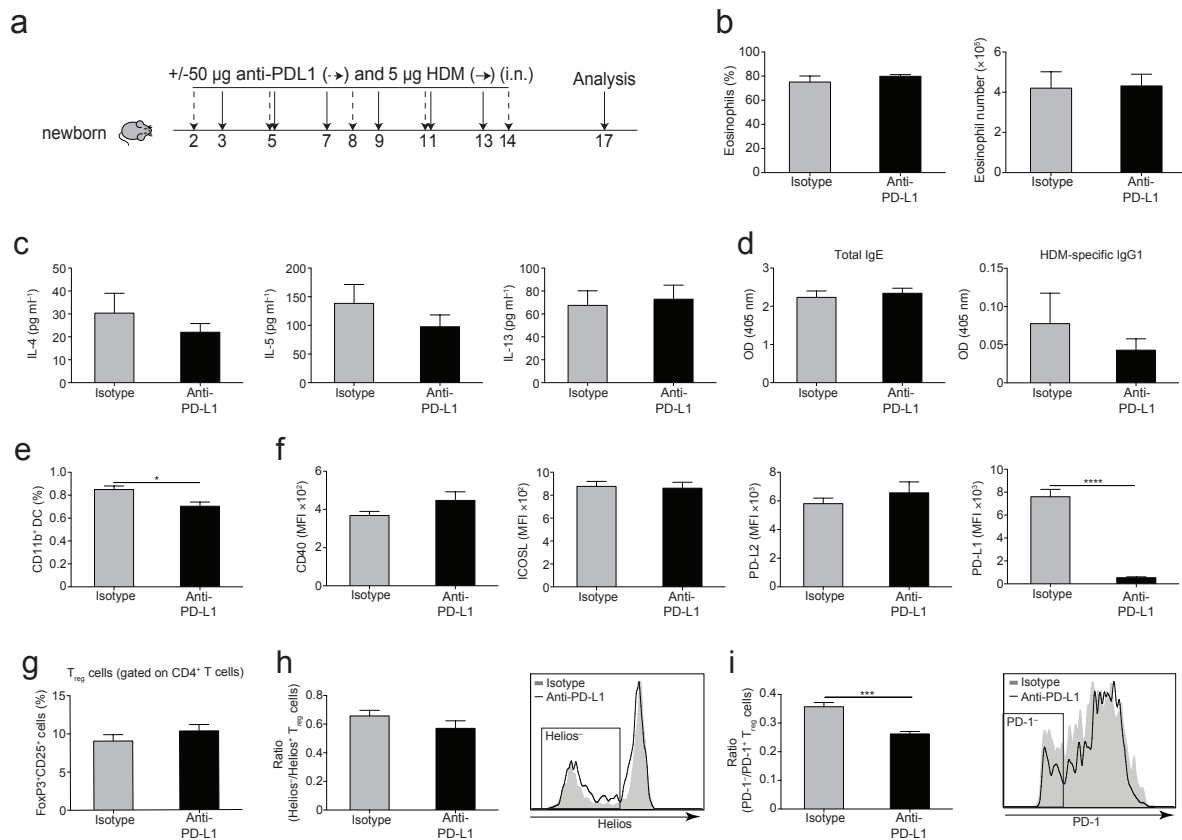

**Supplementary Figure 5: Blockade of PD-L1 during neonatal HDM exposure has no impact on the severity of allergic airway inflammation.**

(a) Representation of the experimental procedure. (b) Frequencies and total numbers of eosinophils infiltrating the BALF. (c) Concentration of IL-4, IL-5, and IL-13 in the BALF and (d) total IgE as well as HDM-specific IgG1 antibody levels in serum. (e) Frequencies of CD11b<sup>+</sup> DCs in the lung and (f) their surface expression of CD40, ICOSL, PD-L1, and PD-L2. (g) Frequencies of T<sub>reg</sub> cells in the CD4<sup>+</sup> T cell compartment, (h) their intracellular expression profile of Helios and (i) their surface expression pattern of PD-1. Results are representative of data generated in two independent experiments. Data are expressed as mean ± s.e.m. (*n* = 6 mice/group). Statistical significance was determined with Student's *t* test. \**P* ≤ 0.05, \*\*\**P* ≤ 0.001, \*\*\*\**P* ≤ 0.0001.

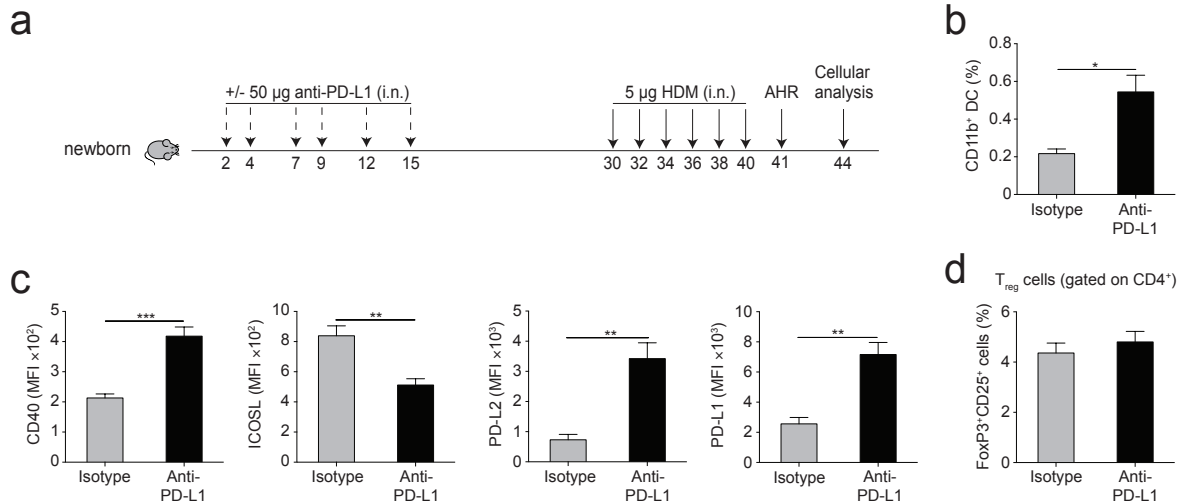

**Supplementary Figure 6: DC phenotypes and T<sub>reg</sub> cell frequencies following blockade of PD-L1.**

(a) Representation of the experimental procedure. (b) Frequencies of CD11b<sup>+</sup> DCs in the lung and (c) their surface expression of CD40, ICOSL, PD-L1, and PD-L2. (d) Frequencies of T<sub>reg</sub> cells in the CD4<sup>+</sup> T cell compartment. Results are representative of two independent experiments. Data are expressed as mean ± s.e.m. (*n* = 4 isotype-treated and *n* = 6 anti-PD-L1-treated mice). Statistical significance was determined with Student's *t* test. \**P* ≤ 0.05, \*\**P* ≤ 0.01, \*\*\**P* ≤ 0.001.

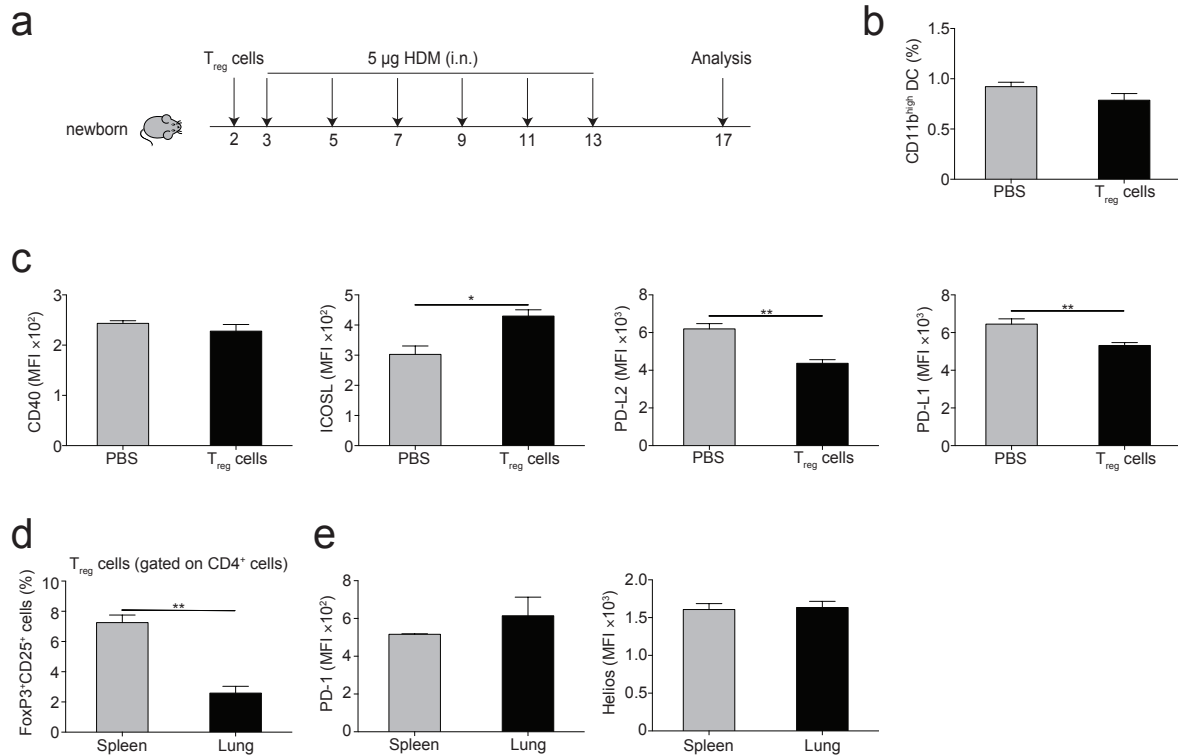

### Supplementary Figure 7: Adult T<sub>reg</sub> cells are capable of decreasing neonatal allergic airway inflammation.

(a) Representation of the experimental procedure. (b) Frequencies of splenic and pulmonary T<sub>reg</sub> cells in the CD4<sup>+</sup> T cell compartment, (b) their surface expression pattern of PD-1 and their intracellular expression profile of Helios. (d) Frequencies of CD11b<sup>+</sup> DCs in the lung and (e) their surface expression of CD40, ICOSL, PD-L1, and PD-L2. Results are representative of two to three independent experiments. Data are expressed as mean ± s.e.m. ( $n = 3$  PBS-treated and  $n = 5$  T<sub>reg</sub> cell-treated mice in **b** and **d**;  $n = 2$  spleen and  $n = 3$  lung samples in **d** and **e**). Statistical significance was determined with Student's *t* test. \* $P \leq 0.05$ , \*\* $P \leq 0.01$ .
